# Supplementary material for: Impact of Wind on the Spatio-Temporal Variation in Concentration of Suspended Solids in Tonle Sap Lake, Cambodia
Source: MDPI journal article supplement (doi:10.3390/earth2030025), 2021-07-06
Supplement: s1 [file s1]

# Impact of Wind on the Spatio-Temporal Variation in Concentration of Suspended Solids in Tonle Sap Lake, Cambodia

Michitaka Sato <sup>1</sup>, Rajendra Khanal <sup>1,2,\*</sup>, Sovannara Uk <sup>1</sup>, Sokly Siev <sup>3</sup>, Sok Ty <sup>4</sup> and Chihiro Yoshimura <sup>1</sup>

<sup>1</sup> Department of Civil and Environmental Engineering, School of Environment and Society, Tokyo Institute of Technology, 2-12-1-M1-4, Ookayama, Meguro-ku, Tokyo 152-8552, Japan; tokodai88@gmail.com (M.S.); uk.s.ab@m.titech.ac.jp (S.U.); yoshimura.c.aa@m.titech.ac.jp (C.Y.)

<sup>2</sup> Policy Research Institute, A think-tank of the Government of Nepal, 3rd Floor of Federal Secretariat Construction and Management Building, Sano Gaucharan-5, Kathmandu, Nepal

<sup>3</sup> Department of Science, Technology and Innovation Policy, General Department of Science, Technology and Innovation, Ministry of Industry, Science, Technology and Innovation; siev.sokly@misti.gov.kh (S.S.)

<sup>4</sup> Faculty of Hydrology and Water Resources Engineering, Institute of Technology of Cambodia, Russian Federation Blvd., P.O. BOX 86, Phnom Penh 12156, Cambodia; sokty@itc.edu.kh (S.T.)

\* Correspondence: rajendra.khanal@gmail.com

## Shear stress analysis

Sediment resuspension occurs when total shear stress exceeds critical shear stress in the lake. For lakes, computing reliable values for the shear stress is more complicated, given the spatial and temporal variation of the shear stresses. Wave and currents may induce shear stresses in different directions. Hence, the magnitude of bottom shear stress due to currents and waves should be compared, and checked if the condition for resuspension.

Resuspension was assessed by calculating and comparing the shear stress of wind-induced currents and waves, and critical shear stress. It is to be noted again that sediment resuspension occurs when total shear stress exceeds critical shear stress in the lake. In addition, resuspension was also compared with other environmental parameters (wind speed, TSS, settling velocity, water depth, sediment grain size, etc.) to understand the sediment resuspension in detail.

### Appendix 3 - Mechanism elucidation for wind shear stress analysis

The magnitude of bottom shear stresses the currents ( $\tau_{curr}$ ), and wind-induced shear stress at the surface of the lake ( $\tau_0$ ) are estimated using a quadratic drag law, as given in eq 3.1.

$$|\tau_{curr}| = 0.1\tau_0 = 0.1C_D\rho_a W^2 \quad (3.1)$$

where  $\rho_a$  denotes the density of air and the  $C_D$  denotes drag coefficient

$$C_D = 0.001(0.75 + 0.067W) \quad (3.2)$$

Shear stress due to currents in large shallow lakes such as TSL is much smaller than shear stress due to waves satisfactory (Chung et al., 2009; James et al., 2004). Critical shear stress can be calculated from eq. 3.3,

$$\tau_{cr} = \tau_c^* \rho R g D_{s50} \quad (3.3)$$

where  $R = \rho_s - \rho / \rho$  (the submerged specific gravity),  $\rho_s$  is the sediment density,  $D_{s50}$  denotes the sediment grain size, and  $g$  is the acceleration of gravity. The critical (non-dimensional) Shield's parameter,  $\tau_c^*$  can be obtained by curve fittings to experimental data set for incipient motion developed by (Parker et al., 2003),

$$\tau_c^* = 0.5 \times [0.22 Re_p^{-0.6} + 0.06 \times 10^{(-7.7 Re_p^{-0.6})}] \quad (3.4)$$

where  $Re_p = \sqrt{g R D_{s50}} D_{s50} / \eta_0$ , with  $\eta_0$  denoting the kinematic viscosity of water.

### Appendix 3 - Mechanism elucidation for wind shear stress analysis

In addition, TSS was also compared with loss on ignition (LOI) (at 550 °C) of sediments. LOI is one of the indicators of sediment organic matters. Sediments with high LOI are expected to have low specific gravity, and high water content (Otsubo and Muraoka, 1987).

#### Assessment of resuspension rate

Resuspension rate was calculated by following eq 3.5,

$$\frac{dS}{dt} = \frac{1}{D}(-\beta S + E) \quad (3.5)$$

where  $S$  is the suspended sediment concentration ( $mgm^{-3}$ ),  $D$  is the depth of water column ( $m$ ),  $\beta$  is the settling velocity ( $ms^{-1}$ ) and  $E$  is the erosion rate ( $mgm^{-3}s^{-1}$ )

The erosion rate is usually parameterized as a function of bottom stress produced by waves and currents. Luettich (1990) showed that wave-induced stress dominates compared to current stress by a factor 4-10 depending on the value of bottom roughness. Wave-induced bottom orbital velocities usually are much smaller than mean current velocities but can also generate the bottom shear stress of the same magnitude. Assuming the existence of threshold value of shear stress and taking only wave-induced shear stress into account the erosion term  $E$  can be written as follows:

$$E = 0 \quad (H < H_c) \quad (3.6)$$

$$E = K \left[ \frac{H - H_c}{H_{ref}} \right]^n \quad (H > H_c) \quad (3.7)$$

where  $H$  is a wave height ( $m$ ),  $H_c$  is the critical value of wave height,  $H_{ref} = 0.01m$  is the reference wave height,  $K$  is the empirical factor,  $n$  is the power exponent. The concept of critical shear stress  $\tau_c > 0$  and respectively  $H_c > 0$  was criticized by (Lavelle et al., 1984) who showed

### Appendix 3 - Mechanism elucidation for wind shear stress analysis

that experimental results can also be interpreted with  $\tau_c = 0$  ( $H_c = 0$ ) due to random nature of bottom stresses and particle movement. Since the wave height depends mainly on quadrature of wind speed the eq. 3.5 can be modified in the following way:

$$\frac{dS}{dt} = \frac{1}{D}(-\beta S + \alpha W^p) \quad (3.8)$$

where  $W$  is the wind speed ( $ms^{-1}$ ),  $\alpha$  is the empirical wind factor and  $p$  is the power exponent.

An analytical solution of Eq. (5.8) can be found in a form of the convolution integral:

$$S = \frac{\alpha}{H} e^{-(\beta t/D)} \int_0^t W^p(\tau) e^{(\beta \tau/D)} d\tau + S(0) e^{-(\beta t/D)} \quad (3.9)$$

where  $S(0)$  is the initial SS concentration at  $t = 0$ . In the case of constant wind speed the solution can be obtained in the closed-form:

$$\begin{aligned} S &= S(0) e^{-(\beta t/D)} + \frac{\alpha W^p}{\beta} (1 - e^{-(\beta t/D)}) \\ &= \frac{\alpha W^p}{\beta} + \left( S(0) - \frac{\alpha W^p}{\beta} \right) e^{-(\beta t/D)} \end{aligned} \quad (3.10)$$

Since,  $\frac{\alpha W^p}{\beta}$  is constant, and under steady state condition, influence of initial conditions decreases to zero with time, whereas erosion increases with time. The SS concentration converges exponentially to the constant value  $\frac{\alpha W^p}{\beta}$ , which represents the balance between erosion and gravitational settling processes.

Under unsteady state condition, when set on a surface, small particles are held by various forces which are combination of physical attractions, shear stresses, and mechanical stresses. The SS concentration can be find with kinetic model of entrainment by a turbulent fluid drag force and the

### Appendix 3 - Mechanism elucidation for wind shear stress analysis

expression at the constant condition as shown in eq 3.11,

$$\frac{dS}{dt} = f_0 \exp\left(-\frac{U}{PE}\right) \quad (3.11)$$

where  $f_0$  is a typical frequency of vibration,  $U$  the height of the potential well, and  $PE$  the average potential energy of a particle.

For the assessment of resuspension, it is required to integrate the wind effect to the parameters of eq. 3.11. The  $PE$  of a particle of sediment in the water column is given as in eq. 3.12,

$$\frac{4}{3}\pi\rho_s r^3 \dot{\beta} = \frac{4}{3}\pi r^3 (\rho_s - \rho_0)g - 6\pi\eta r\beta \quad (3.12)$$

where  $\rho_s, \rho_0$  are the density of sediment and water,  $r$  is the radius of sediment,  $\eta$  is the fluid viscosity and  $v$  is the settling velocity from Stocks Law.

Integrating eq. 5.12, average potential energy of particle is calculated as eq. 3.13,

$$\begin{aligned} PE &= \frac{4}{3}\pi r^3 (\rho_s - \rho_0)g \times \frac{D}{2} \\ &= \frac{2}{3}\pi r^3 (\rho_s - \rho_0)gD \end{aligned} \quad (3.13)$$

Substitution of  $\frac{H}{2}$  to the transition of potential energy is due to  $PE$  is the parameter of average potential energy.

On the other hand,  $Q$  the height of the potential well must be applied wind effect as the relational expression in the form of wind-induced wave energy. The potential energy of the water column per unit bottom area is

$$dE_{p_1} = \int_{-D}^{\gamma} \rho g z dz = \frac{1}{2}\rho g (\gamma^2 - D^2) \quad (3.14)$$

Assuming  $dE_{p_2}$  as the potential energy at the time of still water without waves,

### Appendix 3 - Mechanism elucidation for wind shear stress analysis

$$dE_{p_2} = \int_{-D}^0 \rho g z dz = -\frac{1}{2} \rho g D^2 \quad (3.15)$$

wind-induced wave potential energy is obtained by subtracting the potential energy at still water from the potential energy of the water column as in eq 3.16,

$$dE_p = dE_{p_1} - dE_{p_2} = \frac{1}{2} \rho g \gamma^2 \quad (3.16)$$

Water level change of regular wave  $\gamma = (H/2) \cos(kx - \omega t)$  is substituted and integrated to obtain the average wavelength as below.

$$U = E_p \times L = \frac{1}{2} \rho g \int_x^{x+L} \frac{H^2}{4} \cos^2(kx - \omega t) dx = \frac{1}{16} \rho g H^2 \times L_w \quad (3.17)$$

Substituting eq. 3.14 and 3.17 in eq. 3.11, resuspension rate is obtained as one more definition as given in eq 3.18,

$$\frac{dS}{dt} = f_0 \exp \left( -\frac{3}{8\pi} \frac{\rho_0}{\rho_s - \rho_0} \frac{H^2}{D} \times L_w \right) \quad (3.18)$$

or

$$\frac{dS}{dt} = f_0 \exp \left( K \frac{H^a}{D} \times W^b \right) \quad (3.19)$$

where  $K$  is the given constant value,  $a$  and  $b$  are the power exponents.

### References

- Chung, E. G., Bombardelli, F. A., & Schladow, S. G. (2009). Sediment resuspension in a shallow lake. *Water Resources Research*, 45(5).
- James, W. F., Barko, J. W., & Butler, M. G. (2004). Shear stress and sediment resuspension in relation to submersed macrophyte biomass. *Hydrobiologia*, 515(1-3), 181-191.
- Parker, G., Toro-Escobar, C. M., Ramey, M., & Beck, S. (2003). Effect of floodwater extraction on mountain stream morphology. *Journal of Hydraulic Engineering*, 129(11), 885-895.

### Appendix 3 - Mechanism elucidation for wind shear stress analysis

- Otsubo, K., & Muraoka, K. (1987). Field studies on physical properties of sediment and sediment resuspension, in Lake Kasumigaura. *Japanese Journal of Limnology (Rikusuigaku Zasshi)*, 48(Special), 131-138.
- Luetlich Jr, R. A., Harleman, D. R., & Somlyódy, L. (1990). Dynamic behavior of suspended sediment concentrations in a shallow lake perturbed by episodic wind events. *Limnology and Oceanography*, 35(5), 1050-1067.
- Lavelle, J. W., Mofjeld, H. O., & Baker, E. T. (1984). An in situ erosion rate for a fine-grained marine sediment. *Journal of Geophysical Research: Oceans*, 89(C4), 6543-6552.

### Appendix 3 - Mechanism elucidation for wind shear stress analysis

**Table A3.1.** Total and critical shear stresses across various cross section in TSL, Cambodia

| Point           | Total Shear Stress (Pa) |                       | Total Shear Stress (Pa) | Critical Shear Stress (Pa) |
|-----------------|-------------------------|-----------------------|-------------------------|----------------------------|
|                 | Wind-induced waves      | Wind-induced currents |                         |                            |
| <b>Dec 2016</b> |                         |                       |                         |                            |
| CS1-1           | 2.0                     | 0.0005                | 2.0                     | 3.2                        |
| CS1-2           | 0.2                     | 0.0005                | 0.2                     | 3.2                        |
| CS1-3           | 1.5                     | 0.0005                | 1.5                     | 2.5                        |
|                 |                         |                       |                         |                            |
| CS2-1           | 0.6                     | 0.0011                | 0.6                     | 3.3                        |
| CS2-2           | 0.1                     | 0.0011                | 0.1                     | 2.4                        |
| CS2-3           | 0.6                     | 0.0011                | 0.6                     | 2.7                        |
| CS2-4           | 0.6                     | 0.0011                | 0.6                     | 2.8                        |
| CS2-5           | 0.8                     | 0.0011                | 0.8                     | 3.9                        |
|                 |                         |                       |                         |                            |
| CS3-1           | 1.5                     | 0.0011                | 1.5                     | 3.4                        |
| CS3-2           | 1.5                     | 0.0011                | 1.5                     | 2.7                        |
| CS3-3           | 0.3                     | 0.001                 | 0.3                     | 2.8                        |
| CS3-4           | 1.0                     | 0.001                 | 1.0                     | 1.7                        |
| CS3-5           | 0.1                     | 0.001                 | 0.1                     | 5.4                        |
| CS3-6           | 0.4                     | 0.001                 | 0.4                     | 4.6                        |
| CS3-7           | 0.8                     | 0.0011                | 0.8                     | 2.2                        |
|                 |                         |                       |                         |                            |
| CS4-1           | 0.0                     | 0.0005                | 0.0                     | 1.2                        |
| CS4-2           | 0.4                     | 0.0005                | 0.4                     | 3.1                        |
| CS4-3           | 0.3                     | 0.0005                | 0.3                     | 1.1                        |
| CS4-4           | 0.0                     | 0.0005                | 0.0                     | 1.3                        |
| CS4-5           | 0.2                     | 0.0005                | 0.2                     | 1.5                        |
| CS4-6           | 1.2                     | 0.0005                | 1.2                     | 3.2                        |



### Appendix 3 - Mechanism elucidation for wind shear stress analysis

| Point             | Total Shear Stress (Pa) |                       | Total Shear Stress (Pa) | Critical Shear Stress (Pa) |
|-------------------|-------------------------|-----------------------|-------------------------|----------------------------|
|                   | Wind-induced waves      | Wind-induced currents |                         |                            |
| CS4-7             | 0.1                     | 0.0006                | 0.1                     | 2.9                        |
| CS4-8             | 0.5                     | 0.0006                | 0.5                     | 1.3                        |
|                   |                         |                       |                         |                            |
| CS5-1             | 1.6                     | 0.0003                | 1.6                     | 2.9                        |
| CS5-2             | 0.7                     | 0.0003                | 0.7                     | 2.4                        |
| CS5-3             | 0.5                     | 0.0003                | 0.5                     | 3.9                        |
| CS5-4             | 0.8                     | 0.0004                | 0.8                     | 0.8                        |
| CS5-5             | 0.7                     | 0.0004                | 0.7                     | 1.0                        |
|                   |                         |                       |                         |                            |
| CS6-1             | 1.2                     | 0.0004                | 1.2                     | 3.6                        |
| CS6-2             | 0.7                     | 0.0004                | 0.7                     | 2.1                        |
| CS6-3             | 0.2                     | 0.0004                | 0.2                     | 1.1                        |
| CS6-4             | 1.2                     | 0.0004                | 1.2                     | 1.9                        |
| CS6-5             | 0.2                     | 0.0004                | 0.2                     | 1.5                        |
|                   |                         |                       |                         |                            |
| CS7-1             | 3.0                     | 0.0004                | 3.0                     | 3.9                        |
| CS7-2             | 0.9                     | 0.0004                | 0.9                     | 1.7                        |
| CS7-3             | 1.3                     | 0.0004                | 1.3                     | 5.1                        |
| CS7-4             | 2.9                     | 0.0004                | 2.9                     | 1.6                        |
|                   |                         |                       |                         |                            |
| <b>March 2017</b> |                         |                       |                         |                            |
| CS1-1             | 1.0                     | 0.0004                | 1.0                     | 3.2                        |
| CS1-2             | 0.5                     | 0.0004                | 0.5                     | 3.2                        |
| CS1-3             | 0.4                     | 0.0004                | 0.4                     | 2.5                        |
|                   |                         |                       |                         |                            |

### Appendix 3 - Mechanism elucidation for wind shear stress analysis

| Point | Total Shear Stress (Pa) |                       | Total Shear Stress (Pa) | Critical Shear Stress (Pa) |
|-------|-------------------------|-----------------------|-------------------------|----------------------------|
|       | Wind-induced waves      | Wind-induced currents |                         |                            |
| CS2-1 | 1.6                     | 0.0004                | 1.6                     | 3.3                        |
| CS2-2 | 1.1                     | 0.0004                | 1.1                     | 2.4                        |
| CS2-3 | 0.8                     | 0.0004                | 0.8                     | 2.7                        |
| CS2-4 | 0.2                     | 0.0004                | 0.2                     | 2.8                        |
| CS2-5 | 0.9                     | 0.0004                | 0.9                     | 3.9                        |
|       |                         |                       |                         |                            |
| CS3-1 | 0.2                     | 0.0005                | 0.2                     | 3.4                        |
| CS3-2 | 1.2                     | 0.0005                | 1.2                     | 2.7                        |
| CS3-3 | 0.9                     | 0.0005                | 0.9                     | 2.8                        |
| CS3-4 | 0.7                     | 0.0005                | 0.7                     | 1.7                        |
| CS3-5 | 4.6                     | 0.0005                | 4.6                     | 5.4                        |
| CS3-6 | 0.6                     | 0.0005                | 0.6                     | 4.6                        |
| CS3-7 | 0.3                     | 0.0005                | 0.3                     | 2.2                        |
|       |                         |                       |                         |                            |
| CS4-1 | 0.6                     | 0.0004                | 0.6                     | 1.2                        |
| CS4-2 | 0.7                     | 0.0004                | 0.7                     | 3.1                        |
| CS4-3 | 0.3                     | 0.0004                | 0.3                     | 1.1                        |
| CS4-4 | 0.3                     | 0.0004                | 0.3                     | 1.3                        |
| CS4-5 | 0.1                     | 0.0004                | 0.1                     | 1.5                        |
| CS4-6 | 1.2                     | 0.0004                | 1.2                     | 3.2                        |
| CS4-7 | 0.8                     | 0.0004                | 0.8                     | 2.9                        |
| CS4-8 | 0.0                     | 0.0004                | 0.0                     | 1.3                        |
|       |                         |                       |                         |                            |
| CS5-1 | 0.2                     | 0.0007                | 0.2                     | 2.9                        |
| CS5-2 | 1.7                     | 0.001                 | 1.7                     | 2.4                        |

### Appendix 3 - Mechanism elucidation for wind shear stress analysis

| Point            | Total Shear Stress (Pa) |                       | Total Shear Stress (Pa) | Critical Shear Stress (Pa) |
|------------------|-------------------------|-----------------------|-------------------------|----------------------------|
|                  | Wind-induced waves      | Wind-induced currents |                         |                            |
| CS5-2            | 5.9                     | 0.0005                | <b>5.9</b>              | 2.4                        |
| CS5-3            | 3.3                     | 0.0008                | 3.3                     | 3.9                        |
| CS5-4            | 2.5                     | 0.001                 | <b>2.5</b>              | 0.8                        |
| CS5-5            | 1.8                     | 0.0009                | <b>1.8</b>              | 1.0                        |
|                  |                         |                       |                         |                            |
| CS6-1            | 1.0                     | 0.0006                | 1.0                     | 3.6                        |
| CS6-2            | 3.1                     | 0.0008                | <b>3.1</b>              | 2.1                        |
| CS6-3            | 0.5                     | 0.0008                | 0.5                     | 1.1                        |
| CS6-4            | 0.7                     | 0.0008                | 0.7                     | 1.9                        |
| CS6-5            | 1.8                     | 0.0008                | <b>1.8</b>              | 1.5                        |
|                  |                         |                       |                         |                            |
| CS7-1            | 5.8                     | 0.0008                | <b>5.8</b>              | 3.9                        |
| CS7-2            | 0.2                     | 0.0008                | 0.2                     | 1.7                        |
| CS7-3            | 2.0                     | 0.0008                | 2.0                     | 5.1                        |
| CS7-4            | 3.3                     | 0.0009                | <b>3.3</b>              | 1.6                        |
|                  |                         |                       |                         |                            |
| <b>June 2017</b> |                         |                       |                         |                            |
| CS1-1            | 0.5                     | 0.0009                | 0.5                     | 3.2                        |
| CS1-2            | 0.4                     | 0.0009                | 0.4                     | 3.2                        |
| CS1-3            | 0.0                     | 0.0008                | 0.0                     | 2.5                        |
|                  |                         |                       |                         |                            |
| CS2-1            | 0.6                     | 0.0005                | 0.6                     | 3.3                        |
| CS2-2            | 0.1                     | 0.0005                | 0.1                     | 2.4                        |
| CS2-3            | 0.7                     | 0.0005                | 0.7                     | 2.7                        |
| CS2-4            | 0.5                     | 0.0005                | 0.5                     | 2.8                        |

### Appendix 3 - Mechanism elucidation for wind shear stress analysis

| Point | Total Shear Stress (Pa) |                       | Total Shear Stress (Pa) | Critical Shear Stress (Pa) |
|-------|-------------------------|-----------------------|-------------------------|----------------------------|
|       | Wind-induced waves      | Wind-induced currents |                         |                            |
| CS2-5 | 0.9                     | 0.0005                | 0.9                     | 3.9                        |
|       |                         |                       |                         |                            |
| CS3-1 | 0.7                     | 0.0008                | 0.7                     | 3.4                        |
| CS3-2 | 1.4                     | 0.0008                | 1.4                     | 2.7                        |
| CS3-3 | 1.2                     | 0.0008                | 1.2                     | 2.8                        |
| CS3-4 | 0.9                     | 0.0008                | 0.9                     | 1.7                        |
| CS3-5 | 2.1                     | 0.0008                | 2.1                     | 5.4                        |
| CS3-6 | 3.4                     | 0.0008                | 3.4                     | 4.6                        |
| CS3-7 | 0.9                     | 0.0008                | 0.9                     | 2.2                        |
|       |                         |                       |                         |                            |
| CS4-1 | 0.0                     | 0.0008                | 0.0                     | 1.2                        |
| CS4-2 | 0.0                     | 0.0007                | 0.0                     | 3.1                        |
| CS4-3 | 0.3                     | 0.0007                | 0.3                     | 1.1                        |
| CS4-4 | 0.4                     | 0.0007                | 0.4                     | 1.3                        |
| CS4-5 | 0.0                     | 0.0007                | 0.0                     | 1.5                        |
| CS4-6 | 0.6                     | 0.0007                | 0.6                     | 3.2                        |
| CS4-7 | 0.3                     | 0.0007                | 0.3                     | 2.9                        |
| CS4-8 | 0.0                     | 0.0007                | 0.0                     | 1.3                        |
|       |                         |                       |                         |                            |
| CS5-1 | 0.7                     | 0.0006                | 0.5                     | 3.2                        |
| CS5-2 | 1.0                     | 0.0006                | 0.4                     | 3.2                        |
| CS5-3 | 1.9                     | 0.0006                | 0.0                     | 2.5                        |
| CS5-4 | 0.7                     | 0.0006                | 0.6                     | 3.3                        |
| CS5-5 | 0.7                     | 0.0006                | 0.1                     | 2.4                        |
|       |                         |                       |                         |                            |

### Appendix 3 - Mechanism elucidation for wind shear stress analysis

| Point | Total Shear Stress (Pa) |                       | Total Shear Stress (Pa) | Critical Shear Stress (Pa) |
|-------|-------------------------|-----------------------|-------------------------|----------------------------|
|       | Wind-induced waves      | Wind-induced currents |                         |                            |
| CS6-1 | 1.3                     | 0.0007                | 0.7                     | 2.7                        |
| CS6-2 | 0.6                     | 0.0007                | 0.5                     | 2.8                        |
| CS6-3 | 0.5                     | 0.0007                | 0.9                     | 3.9                        |
| CS6-4 | 0.3                     | 0.0006                | 0.7                     | 3.4                        |
| CS6-5 | 1.0                     | 0.0006                | 1.4                     | 2.7                        |
|       |                         |                       |                         |                            |
| CS7-1 | 2.9                     | 0.0007                | 1.2                     | 2.8                        |
| CS7-2 | 0.6                     | 0.0007                | 0.9                     | 1.7                        |
| CS7-3 | 1.1                     | 0.0007                | 2.1                     | 5.4                        |
| CS7-4 | 0.5                     | 0.0007                | 3.4                     | 4.6                        |
