# Supplementary material for: Impact of Wind on the Spatio-Temporal Variation in Concentration of Suspended Solids in Tonle Sap Lake, Cambodia
Source: MDPI journal article supplement (doi:10.3390/earth2030025), 2021-07-06
Supplement: s1 [file s1]

# Impact of Wind on the Spatio-Temporal Variation in Concentration of Suspended Solids in Tonle Sap Lake, Cambodia

Michitaka Sato <sup>1</sup>, Rajendra Khanal <sup>1,2,\*</sup>, Sovannara Uk <sup>1</sup>, Sokly Siev <sup>3</sup>, Sok Ty <sup>4</sup> and Chihiro Yoshimura <sup>1</sup>

<sup>1</sup> Department of Civil and Environmental Engineering, School of Environment and Society, Tokyo Institute of Technology, 2-12-1-M1-4, Ookayama, Meguro-ku, Tokyo 152-8552, Japan; tokodai88@gmail.com (M.S.); uk.s.ab@m.titech.ac.jp (S.U.); yoshimura.c.aa@m.titech.ac.jp (C.Y.)

<sup>2</sup> Policy Research Institute, A think-tank of the Government of Nepal, 3rd Floor of Federal Secretariat Construction and Management Building, Sano Gaucharan-5, Kathmandu, Nepal

<sup>3</sup> Department of Science, Technology and Innovation Policy, General Department of Science, Technology and Innovation, Ministry of Industry, Science, Technology and Innovation; siev.sokly@misti.gov.kh (S.S.)

<sup>4</sup> Faculty of Hydrology and Water Resources Engineering, Institute of Technology of Cambodia, Russian Federation Blvd., P.O. BOX 86, Phnom Penh 12156, Cambodia; sokty@itc.edu.kh (S.T.)

\* Correspondence: rajendra.khanal@gmail.com

## Appendix 4: Relationship of TSS with wind speed, water depth, settling velocity, and loss on ignition across Tonle Sap Lake, Cambodia

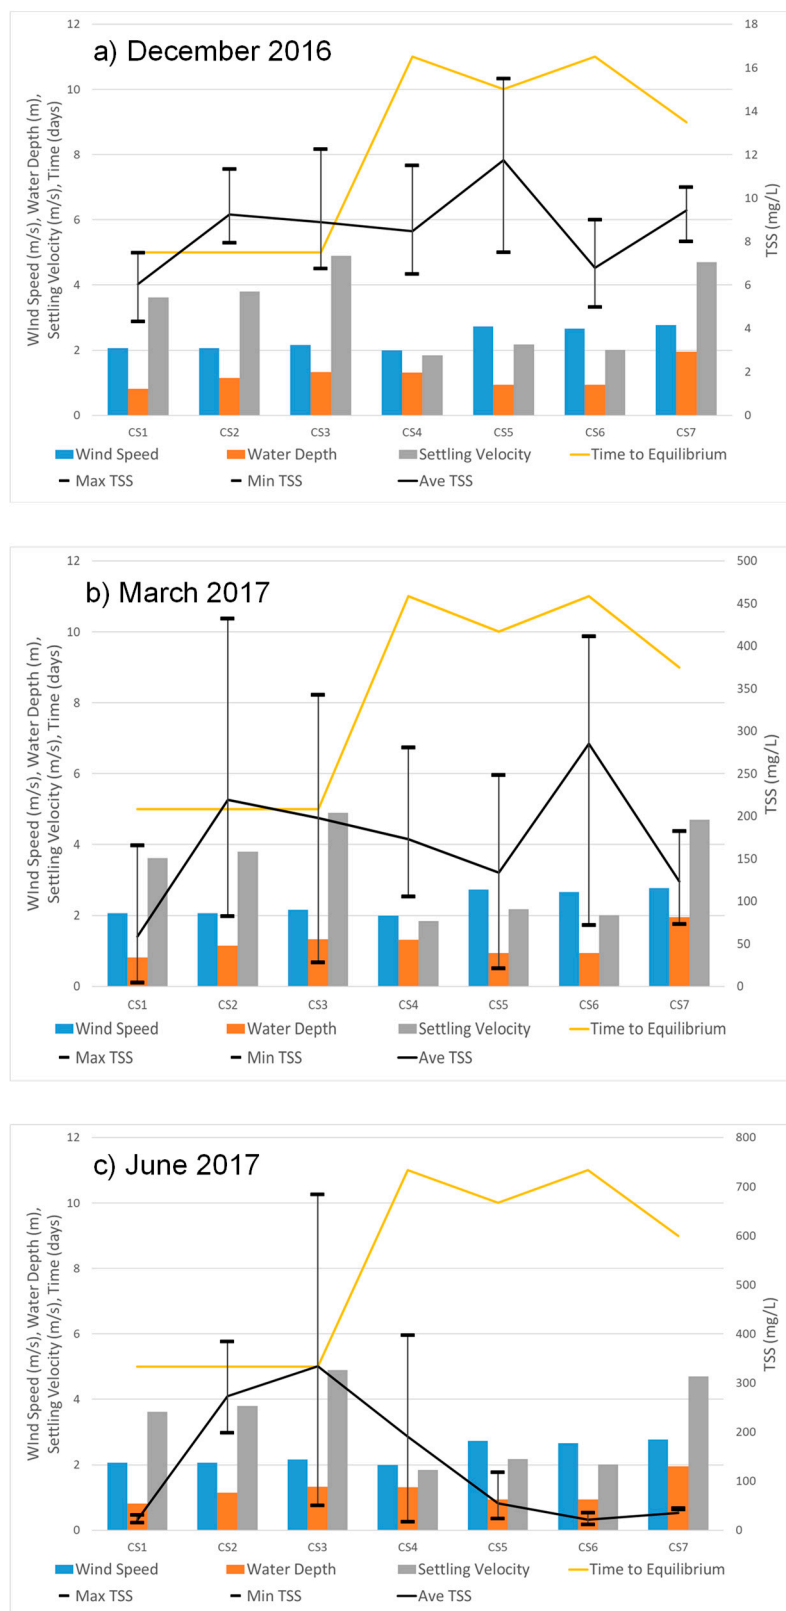

Fig. A4.1 Relationship between wind speed, water depth, settling velocity, total suspended solids (TSS) and time to reach equilibrium TSS in Tonle Sap Lake.

*For details about the cross section, please refer main text*

Appendix 4: Relationship of TSS with wind speed, water depth, settling velocity, and loss on ignition across Tonle Sap Lake, Cambodia

a) Dec 2016

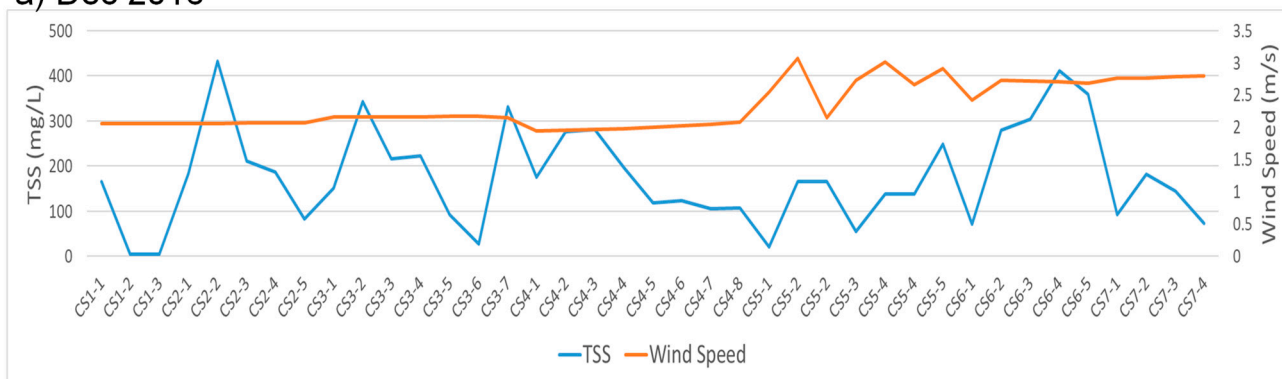

b) March 2017

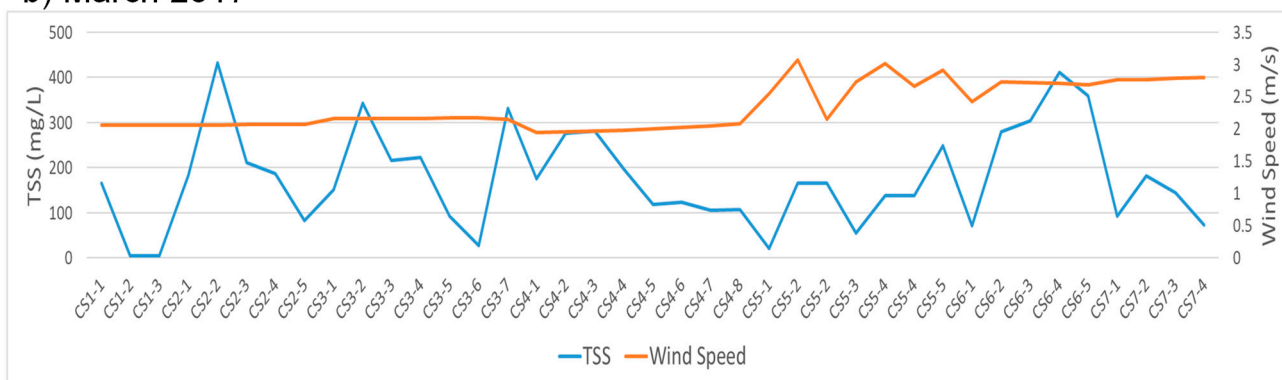

c) June 2017

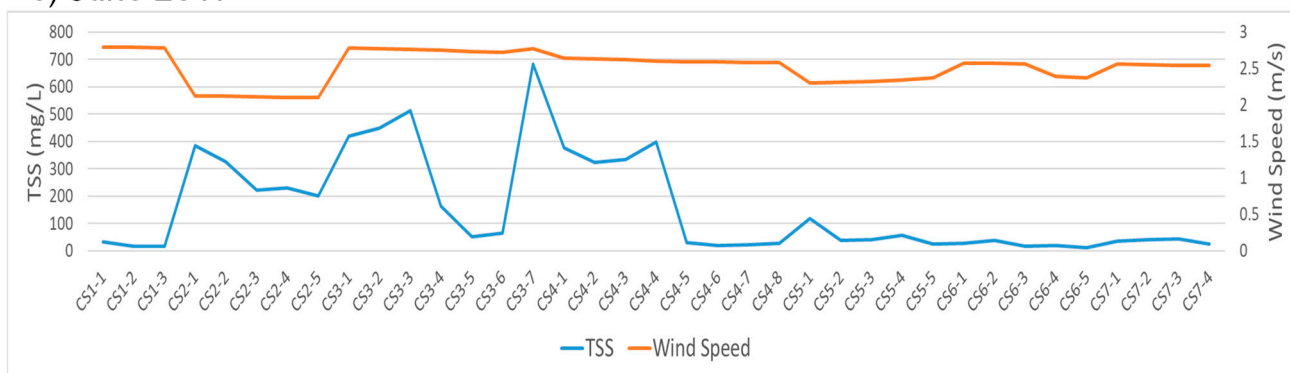

Fig. A4.2 Comparison of TSS and wind speed in, a) Dec. 2016, b) March 2017, and c) Jun 2017

Appendix 4: Relationship of TSS with wind speed, water depth, settling velocity, and loss on ignition across Tonle Sap Lake, Cambodia

a) Dec 2016

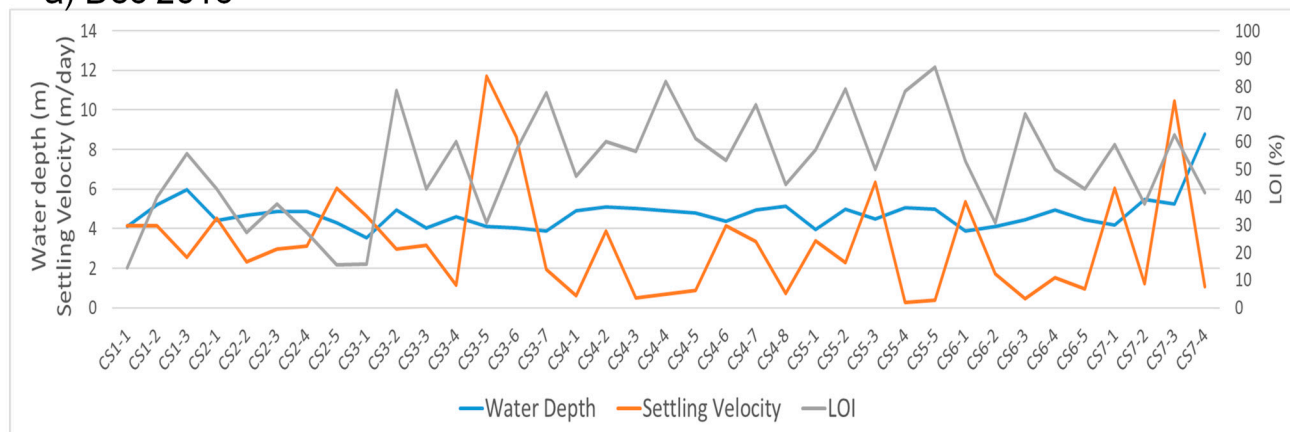

b) March 2017

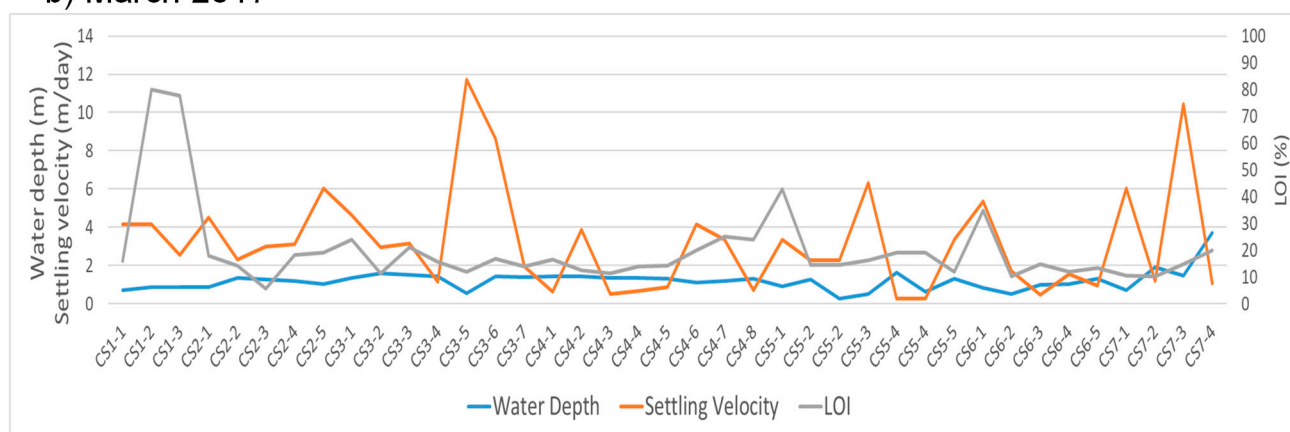

c) June 2017

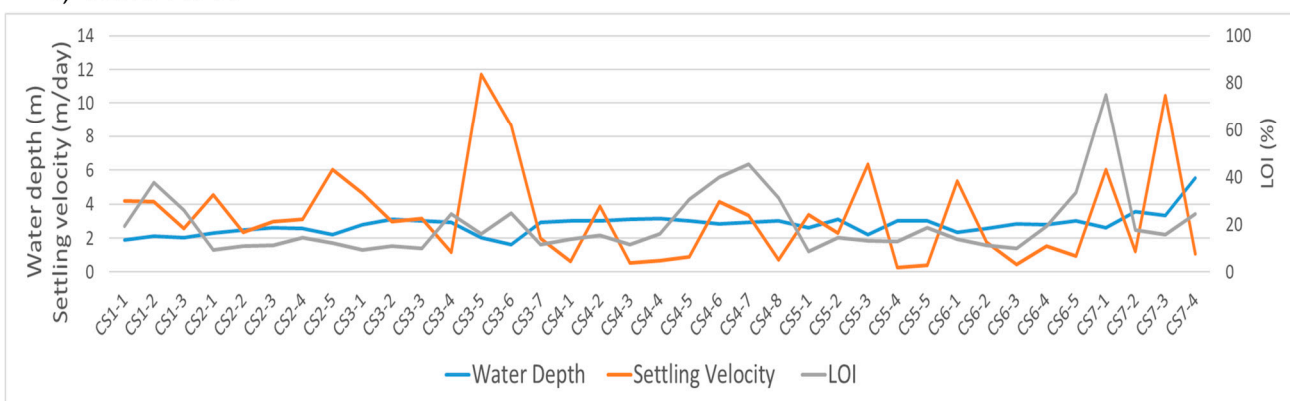

Fig. A4.3. Comparison of Water depth, settling velocity and LOI in, a) Dec. 2016, b) March 2017, and c) Jun 2017

Appendix 4: Relationship of TSS with wind speed, water depth, settling velocity, and loss on ignition across Tonle Sap Lake, Cambodia

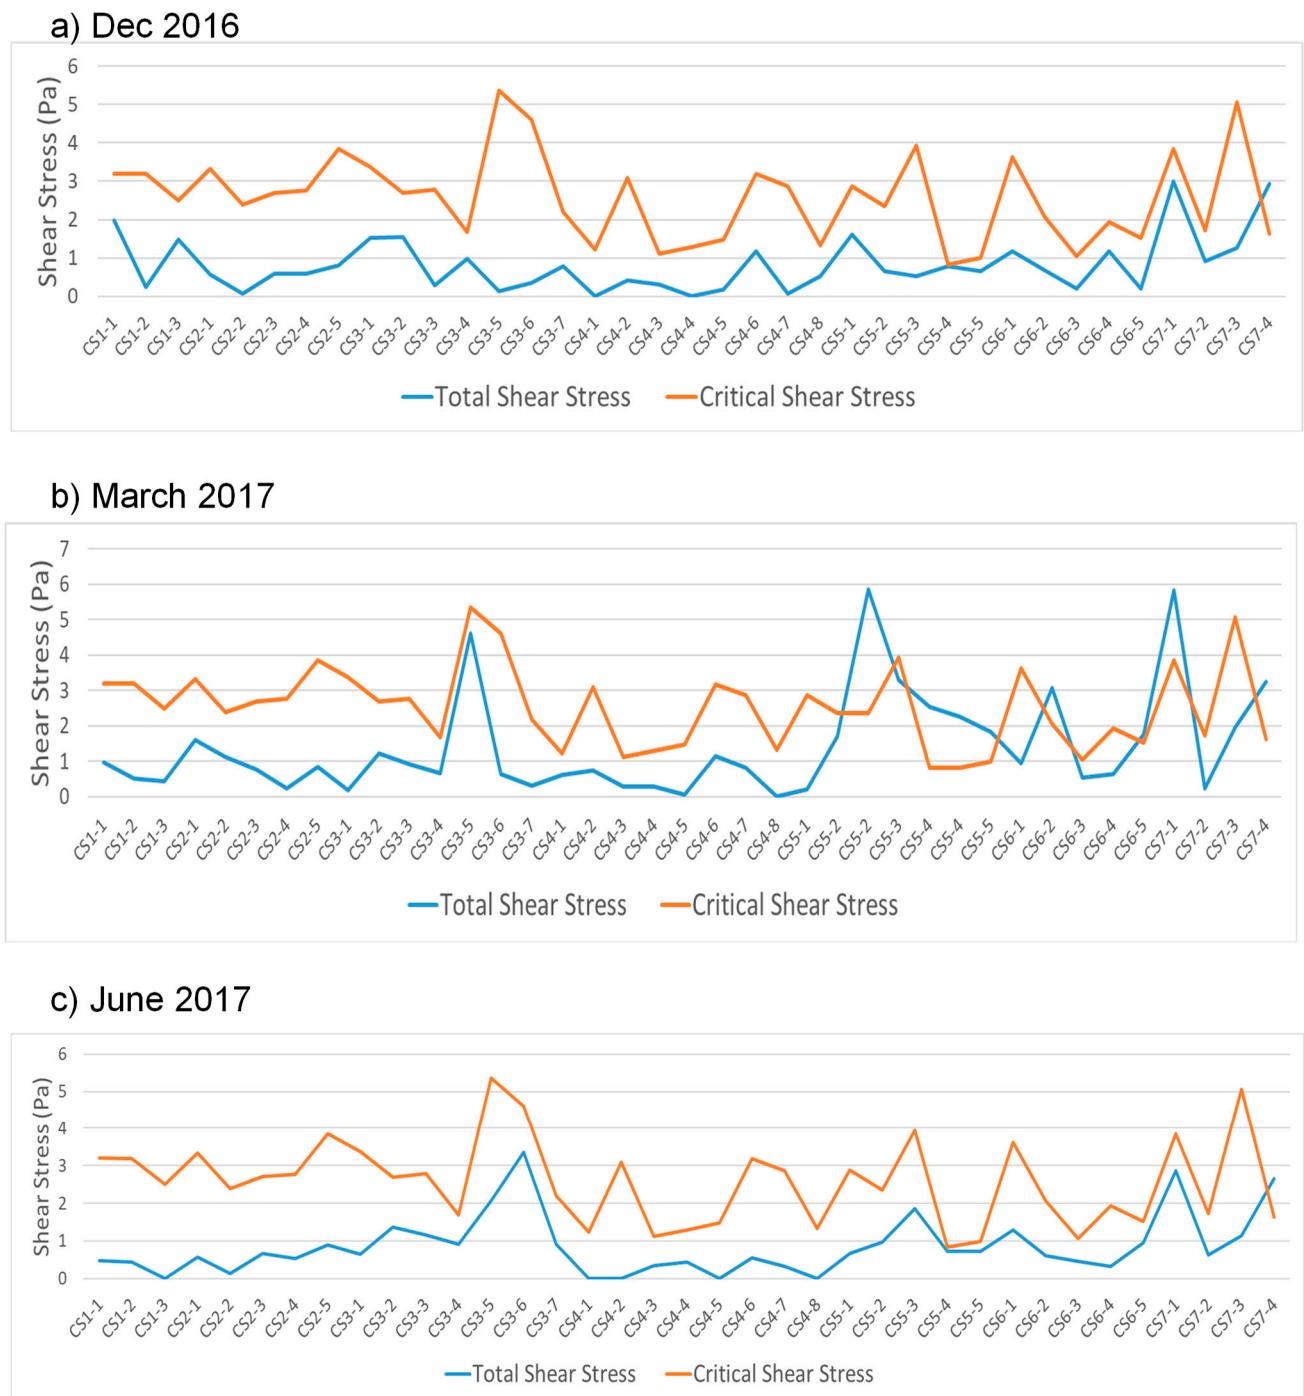

Fig. A4.4. Comparison of total and critical shear stresses in, a) Dec. 2016, b) March 2017, and c) Jun 2017
