# Supplementary material for: Impact of Wind on the Spatio-Temporal Variation in Concentration of Suspended Solids in Tonle Sap Lake, Cambodia
Source: MDPI journal article supplement (doi:10.3390/earth2030025), 2021-07-06
Supplement: s1 [file s1]

## Impact of Wind on the Spatio-Temporal Variation in Concentration of Suspended Solids in Tonle Sap Lake, Cambodia

Michitaka Sato <sup>1</sup>, Rajendra Khanal <sup>1,2,\*</sup>, Sovannara Uk <sup>1</sup>, Sokly Siev <sup>3</sup>, Sok Ty <sup>4</sup> and Chihiro Yoshimura <sup>1</sup>

<sup>1</sup> Department of Civil and Environmental Engineering, School of Environment and Society, Tokyo Institute of Technology, 2-12-1-M1-4, Ookayama, Meguro-ku, Tokyo 152-8552, Japan; tokodai88@gmail.com (M.S.); uk.s.ab@m.titech.ac.jp (S.U.); yoshimura.c.aa@m.titech.ac.jp (C.Y.)

<sup>2</sup> Policy Research Institute, A think-tank of the Government of Nepal, 3rd Floor of Federal Secretariat Construction and Management Building, Sano Gaucharan-5, Kathmandu, Nepal

<sup>3</sup> Department of Science, Technology and Innovation Policy, General Department of Science, Technology and Innovation, Ministry of Industry, Science, Technology and Innovation; siev.sokly@misti.gov.kh (S.S.)

<sup>4</sup> Faculty of Hydrology and Water Resources Engineering, Institute of Technology of Cambodia, Russian Federation Blvd., P.O. BOX 86, Phnom Penh 12156, Cambodia; sokty@itc.edu.kh (S.T.)

\* Correspondence: rajendra.khanal@gmail.com

### Empirical relationships between TSS and wind speed

Empirical relationships between wind and TSS was derived by using observed TSS, interpolated wind speed, and other environmental parameters (i.e. water depth, shear stress). The method of derivation was nonlinear regression analysis (eq 2.1 to 2.10) using the least squares method.

$$TSS = aW + b \quad (2.1)$$

$$TSS = aW^2 + bW + c \quad (2.2)$$

$$TSS = aW^3 + bW^2 + cW + d \quad (2.3)$$

$$TSS = a \frac{W}{D} + b \quad (2.4)$$

$$TSS = a \frac{W^2}{D} + b \frac{W}{D} + c \quad (2.5)$$

$$TSS = a \frac{W^3}{D} + b \frac{W^2}{D} + c \frac{W}{D} + d \quad (2.6)$$

## Appendix 2 - Empirical relationships between TSS and wind speed

$$TSS = a\tau_{wave} + b \quad (2.7)$$

$$TSS = ae^{bW} + c \quad (2.8)$$

$$TSS = ae^{b(W/D)} + c \quad (2.9)$$

$$TSS = ae^{b\tau_{wave}} + c \quad (2.10)$$

where  $TSS$  is total suspended solids concentration ( $mg/L$ ),  $U$  is wind speed ( $m/s$ ),  $D$  is water depth ( $m$ ),  $\tau_{wave}$  is shear stress ( $Pa$ ),  $a, b, c, d$  are the calibrated parameters. Some of above relationships eq. 2.1, 2.3, and 2.7 had been explored previously (Hamilton and Mitchell, 1996), whereas, other equation is being investigated for the first time. eqs., 2.4, 2.5, and 2.6 were added specially to understand impact of water depth in TSS, as in general in TSL, TSS varied inversely with water depth (Siev et al., 2018).

In addition, in some cross section, TSS was as high as 650  $mg/L$  (Siev et al., 2018), so it was also worthwhile to explore exponential relationships as in eqs. 2.8, 2.9, and 2.10.

Shear stress varies with depth, wave length, wave period, and was calculated as shown in eq. 2.11.

$$\tau_{wave} = H \times \frac{\rho \left\{ \eta_0 \left( \frac{2\pi}{T} \right)^3 \right\}^{0.5}}{2 \sinh \frac{2\pi h}{L}} \quad (2.11)$$

where  $\tau$  is shear stress ( $dyne/cm^2 = 0.1 Pa$ ),  $\rho = 1.0(g/cm^3)$  is water density,  $\eta_0 = 0.01(cm^2/s)$  is the kinematic viscosity of water,  $H$  is wave height ( $cm$ ),  $T$  is wave period ( $s$ ),  $D$  is water depth ( $cm$ ),  $L$  is wave length ( $cm$ ). In addition, wave length and wave period vary during dry and wet season (eq 2.12 – 2.15),

## Appendix 2 - Empirical relationships between TSS and wind speed

1) Dry season;

$$T = \frac{2\pi W}{g} \times 2.82 \left( \frac{gH}{W^2} \right)^{0.57} \quad (2.12)$$

$$L = CT = \sqrt{gh} \times \frac{2\pi W}{g} \times 2.82 \left( \frac{gH}{W^2} \right)^{0.57} \quad (2.13)$$

2) Wet season;

$$T = \frac{2\pi W}{g} \times 2.88 \left( \frac{gH}{W^2} \right)^{0.64} \quad (2.14)$$

$$L = CT = \frac{2\pi W^2}{g} \times \left\{ 2.88 \left( \frac{gH}{W^2} \right)^{0.64} \right\}^2 \quad (2.15)$$

Parameters related to wave period and length were different in dry and wet season due to the relation from Bretschneider methods (Bretschneider and de Weille, 2018), and waves consider as long waves and as deep water waves at dry and wet season due to differences of water level.

Empirical relationships were derived and compared by R2 and RMSE at three conditions, i) whole area of TSL for combined wet and dry season (Table A2.1 ), ii) whole area of TSL for wet (Table A2.2.) and dry (Table A2.2) season, and iii) each cross section of TSL for dry season (Table A2.3 to 2.10).

## Appendix 2 - Empirical relationships between TSS and wind speed

### References

- Bretschneider, F., & De Wille, J. R. (2018). Introduction to electrophysiological methods and instrumentation. Academic Press.
- Hamilton, D. P., & Mitchell, S. F. (1996). An empirical model for sediment resuspension in shallow lakes. *Hydrobiologia*, 317(3), 209-220
- Siev, S., Yang, H., Sok, T., Uk, S., Song, L., Kodikara, D., Oeurng, C., Hul, S., & Yoshimura, C., (2018). Sediment dynamics in a large shallow lake characterized by seasonal flood pulse in Southeast Asia. *Science of the Total Environment*, 631, pp.597-607.

## Appendix 2 - Empirical relationships between TSS and wind speed

**Table A2.1** Empirical relationship for the whole area of TSL (dry + wet season)

| Regression Relationship                                         | $R^2$    | $RMSE$ |
|-----------------------------------------------------------------|----------|--------|
| $TSS = -0.97705W + 113.5862$                                    | 6.93E-06 | 139    |
| $TSS = -185.998W^2 + 921.2936W - 1003.01$                       | 0.0288   | 137    |
| $TSS = -59.9944W^3 + 244.4455W^2 - 90.7807W - 222.719$          | 0.0342   | 136    |
| $TSS = 28.61147 W/D + 74.09183$                                 | 0.0542   | 135    |
| $TSS = 0.028668 W^2/D + 28.54154 W/D + 74.09166$                | 0.0542   | 135    |
| $TSS = -20.9059 W^3/D + 102.8251 W^2/D - 96.099 W/D + 75.21281$ | 0.0546   | 111    |
| $TSS = 11.58158\tau_{wave} + 97.42251$                          | 0.00957  | 139    |
| $TSS = 56.47475 \times \exp(-0.01285W) + 56.47475$              | 4.99E-06 | 139    |
| $TSS = 18895.06 \times \exp(0.001501 W/D) - 18821$              | 0.0540   | 135    |
| $TSS = 1149.949 \times \exp(0.009681\tau_{wave}) - 1052.28$     | 0.00946  | 138    |

## Appendix 2 - Empirical relationships between TSS and wind speed

**Table A2.2.** Empirical relationship for the whole area of TSL in wet season

| Regression Relationship                                          | $R^2$   | $RMSE$ |
|------------------------------------------------------------------|---------|--------|
| $TSS = 0.357106W + 7.051045$                                     | 0.00735 | 2.01   |
| $TSS = 1.686302W^2 - 8.16135W + 17.39081$                        | 0.0211  | 1.99   |
| $TSS = 0.800026W^3 - 3.90458W^2 + 4.502085W + 8.057258$          | 0.0235  | 1.99   |
| $TSS = 1.239299 W/D + 7.261585$                                  | 0.00818 | 2.01   |
| $TSS = 0.785709 W^2/D - 2.06481 W/D + 7.951719$                  | 0.0106  | 2.00   |
| $TSS = 3.654301 W^3/D - 17.7541 W^2/D + 20.29054 W/D + 8.074844$ | 0.0231  | 3.25   |
| $TSS = -0.44856\tau_{wave} + 8.279326$                           | 0.0255  | 1.99   |
| $TSS = 3.555902 \times \exp(0.083674W) + 3.557943$               | 0.00759 | 2.01   |
| $TSS = 3.652916 \times \exp(0.290726 W/D) + 3.653002$            | 0.00827 | 2.01   |
| $TSS = 5.389258 \times \exp(-0.08969\tau_{wave}) + 2.90613$      | 0.0247  | 1.99   |

## Appendix 2 - Empirical relationships between TSS and wind speed

**Table A2.3.** Empirical relationship for the whole area of TSL in dry season

| Regression Relationship                                           | $R^2$        | $RMS$<br>$E$ |
|-------------------------------------------------------------------|--------------|--------------|
| $TSS = -14.0558W + 195.657$                                       | 0.00088<br>8 | 145          |
| $TSS = 459.2688W^2 - 2244.54W + 2860.55$                          | 0.0572       | 141          |
| $TSS = 131.4297W^3 - 553.303W^2 + 328.4071W + 706.7222$           | 0.0507       | 141          |
| $TSS = -2.46552 W/D + 165.6434$                                   | 0.000422     | 145          |
| $TSS = 7.358683 W^2/D - 20.4493 W/D + 165.8009$                   | 0.00152      | 145          |
| $TSS = 139.3804 W^3/D - 674.122 W^2/D + 799.5387 W/D + 163.61445$ | 0.0178       | 20.0         |
| $TSS = -14.4267\tau + 177.7043$                                   | 0.0147       | 143          |
| $TSS = 145.8207 \times \exp(-0.93165W) + 145.8189$                | 0.00251      | 145          |
| $TSS = 82.95514 \times \exp(-0.03297 W/D) + 82.95515$             | 0.000423     | 145          |
| $TSS = 82.10698 \times \exp(-0.02471\tau_{wave}) + 82.10698$      | 0.00328      | 144          |

## Appendix 2 - Empirical relationships between TSS and wind speed

**Table A2.4.** Empirical relationship at CS1 (CS1-1 to CS1-4) in dry season

| Regression Relationship                                                      | $R^2$  | $RMSE$ |
|------------------------------------------------------------------------------|--------|--------|
| $TSS = -46.0135W + 134.7192$                                                 | 0.0785 | 25.2   |
| $TSS = 402.5403W^2 - 2017.38W + 2508.103$                                    | 0.223  | 31.7   |
| $TSS = 136.6375W^3 - 574.625W^2 + 293.4587W + 669.8042$                      | 0.224  | 31.7   |
| $TSS = 33.97792 W/D - 24.6607$                                               | 0.354  | 43.6   |
| $TSS = -12.8735 W^2/D + 59.62325 W/D - 18.528$                               | 0.368  | 44.8   |
| $TSS = -1974.71 W^3/D + 9630.886 W^2/D - 11388.2 W/D - 137.125$              | 0.475  | 43.2   |
| $TSS = 5.15549\tau_{wave} - 4.14939$                                         | 0.287  | 23.1   |
| $TSS = 4.6 \times 10^8 \times \exp(-18.918W) + 8.297129$                     | 0.216  | 31.2   |
| $TSS = 5.62 \times 10^{-5} \times \exp(5.033471 W/D) + 5.320411$             | 0.962  | 52.9   |
| $TSS = 1.72644 \times 10^{-5} \times \exp(1.112827136\tau_{wave}) - 1.31515$ | 0.919  | 21.7   |



## Appendix 2 - Empirical relationships between TSS and wind speed

**Table A2.5.** Empirical relationship at CS2 (CS2-1 to CS2-5) in dry season

| Regression Relationship                                           | $R^2$  | $RMSE$ |
|-------------------------------------------------------------------|--------|--------|
| $TSS = -272.105W + 855.1901$                                      | 0.514  | 227    |
| $TSS = -3766.89W^2 + 19241.99W - 23466.7$                         | 0.711  | 259    |
| $TSS = -1117.53W^3 + 4790.455W^2 - 2305.33W - 5621.19$            | -0.351 | 248    |
| $TSS = 41.06283 W/D + 149.1664$                                   | 0.0153 | 188    |
| $TSS = -603.13 W^2/D + 1062.512 W/D + 550.0027$                   | 0.683  | 256    |
| $TSS = -143.598 W^3/D + 145.9933 W^2/D + 132.7386 W/D + 540.4325$ | 0.686  | 256    |
| $TSS = -121.097\tau_{wave} + 810.3705$                            | 0.217  | 286    |
| $TSS = 3352.857 \times \exp(-0.10648W) - 2398.18$                 | 0.512  | 226    |
| $TSS = 3234.216 \times \exp(0.012069 W/D) - 3083.07$              | 0.0150 | 188    |
| $TSS = 12893.49 \times \exp(-0.00983\tau_{wave}) - 12070.3$       | 0.215  | 232    |

## Appendix 2 - Empirical relationships between TSS and wind speed

**Table A2.6.** Empirical relationship at CS3 (CS3-1 to CS3-7) in dry season

| Regression Relationship                                          | $R^2$    | $RMSE$ |
|------------------------------------------------------------------|----------|--------|
| $TSS = -121.879W + 481.4072$                                     | 0.0731   | 154    |
| $TSS = -1134.07W^2 + 5762.631W - 6987.83$                        | 0.410    | 197    |
| $TSS = -310.312W^3 + 1331.371W^2 - 702.725W - 1398.41$           | 0.416    | 198    |
| $TSS = 0.9866 W/D + 155.829$                                     | 1.59E-05 | 148    |
| $TSS = -124.041 W^2/D + 238.7834 W/D + 248.2145$                 | 0.0415   | 151    |
| $TSS = -1232.43 W^3/D + 6049.091 W^2/D - 7417.12 W/D + 367.9823$ | 0.412    | 182    |
| $TSS = -50.7269\tau_{wave} + 417.0396$                           | 0.0349   | 148    |
| $TSS = 6180.155 \times \exp(-0.02051W) - 5694.48$                | 0.0723   | 155    |
| $TSS = 78.19084 \times \exp(0.00683 W/D) + 78.19084$             | 8.73E-06 | 148    |
| $TSS = 3994.28 \times \exp(-0.01319\tau_{wave}) - 3576.21$       | 0.0342   | 148    |

## Appendix 2 - Empirical relationships between TSS and wind speed

**Table A2.7.** Empirical relationship at CS4 (CS4-1 to CS4-8) in dry season

| Regression Relationship                                          | $R^2$   | $RMSE$ |
|------------------------------------------------------------------|---------|--------|
| $TSS = 30.92737W + 39.57059$                                     | 0.00385 | 100    |
| $TSS = 2159.245W^2 - 9941.79W + 11414.55$                        | 0.573   | 158    |
| $TSS = 723.0246W^3 - 2757.05W^2 + 1128.844W + 3156.17$           | 0.589   | 159    |
| $TSS = 107.9979 W/D + 7.040152$                                  | 0.150   | 111    |
| $TSS = 154.978 W^2/D + 179.944 W/D - 47.4677$                    | 0.224   | 116    |
| $TSS = 2731.268 W^3/D - 12498.2 W^2/D + 14129.72 W/D + 71.81387$ | 0.589   | 156    |
| $TSS = -84.6489\tau_{wave} + 550.7531$                           | 0.130   | 100    |
| $TSS = 14.87521 \times \exp(0.800383W) + 14.8778$                | 0.0113  | 101    |
| $TSS = 14575.56 \times \exp(0.007365 W/D) - 14568.7$             | 0.150   | 111    |
| $TSS = 5348.832 \times \exp(-0.01717\tau_{wave}) - 4781.47$      | 0.171   | 100    |

## Appendix 2 - Empirical relationships between TSS and wind speed

**Table A2.8.** Empirical relationship at CS5 (C5-1 to CS5-5) in dry season

| Regression Relationship                                         | $R^2$ | $RMSE$ |
|-----------------------------------------------------------------|-------|--------|
| $TSS = 111.816W - 192.988$                                      | 0.524 | 78.4   |
| $TSS = 48.94536W^2 - 121.537W + 76.67405$                       | 0.541 | 78.8   |
| $TSS = 9.587697W^3 - 12.086W^2 + 2.242239W - 2.7899$            | 0.543 | 78.9   |
| $TSS = 17.2744 W/D + 36.76444$                                  | 0.297 | 72.2   |
| $TSS = 22.21485 W^2/D - 36.4198 W/D + 32.38688$                 | 0.388 | 74.7   |
| $TSS = 128.2505 W^3/D - 617.43 W^2/D + 750.7774 W/D + 22.25363$ | 0.563 | 79.3   |
| $TSS = -50.9826\tau_{wave} + 319.8818$                          | 0.583 | 72.6   |
| $TSS = 5.299968 \times \exp(1.175741W) - 25.0721$               | 0.550 | 78.8   |
| $TSS = 10559.67 \times \exp(0.001617 W/D) - 10522.8$            | 0.296 | 71.9   |
| $TSS = 3702.322 \times \exp(-0.01465\tau_{wave}) - 3375.7$      | 0.407 | 72.3   |

## Appendix 2 - Empirical relationships between TSS and wind speed

**Table A2.9.** Empirical relationship at CS6 (CS6-1 to CS6-5) in dry season

| Regression Relationship                                         | $R^2$ | $RMSE$ |
|-----------------------------------------------------------------|-------|--------|
| $TSS = 351.441W - 737.573$                                      | 0.519 | 135    |
| $TSS = 1502.355W^2 - 6697.44W + 7406.003$                       | 0.809 | 174    |
| $TSS = 437.401W^3 - 1610.46W^2 + 636.1412W + 1689.499$          | 0.816 | 175    |
| $TSS = 78.69073 W/D - 15.8522$                                  | 0.549 | 139    |
| $TSS = 235.9623 W^2/D - 574.596 W/D + 56.81924$                 | 0.673 | 147    |
| $TSS = 69.28737 W^3/D - 122.834 W^2/D - 109.525 W/D + 50.75793$ | 0.668 | 147    |
| $TSS = -162.842\tau_{wave} + 918.2791$                          | 0.626 | 111    |
| $TSS = 1.89 \times 10^{-5} \times \exp(6.100683W) - 5.98787$    | 0.813 | 153    |
| $TSS = 54236.85 \times \exp(0.001442 W/D) - 54252.8$            | 0.548 | 138    |
| $TSS = 4207.832 \times \exp(-0.04881\tau_{wave}) - 3194.11$     | 0.624 | 111    |

## Appendix 2 - Empirical relationships between TSS and wind speed

**Table A2.10.** Empirical relationship at CS7 (C7-1 to CS7-4) in dry season

| Regression Relationship                                        | $R^2$ | $RMSE$ |
|----------------------------------------------------------------|-------|--------|
| $TSS = 157.8658W - 325.628$                                    | 0.546 | 88.4   |
| $TSS = 568.3595W^2 - 2550.69W + 2842.035$                      | 0.759 | 79.1   |
| $TSS = 152.588W^3 - 564.856W^2 + 230.2635W + 590.1435$         | 0.543 | 78.9   |
| $TSS = 60.20713 W/D - 0.32355$                                 | 0.740 | 78.5   |
| $TSS = 234.6982 W^2/D - 606.142 W/D + 49.99112$                | 0.869 | 82.1   |
| $TSS = 84.2366 W^3/D - 165.574 W^2/D - 144.154 W/D + 53.24668$ | 0.882 | 82.5   |
| $TSS = -83.7729\tau_{wave} + 518.6047$                         | 0.745 | 55.6   |
| $TSS = 0.000421 \times \exp(4.587612W) - 6.56971$              | 0.725 | 78.2   |
| $TSS = 21469.47 \times \exp(0.002782 W/D) - 21469.6$           | 0.739 | 78.3   |
| $TSS = 1675.825 \times \exp(-0.400915\tau_{wave}) - 134.286$   | 0.774 | 51.2   |
